# Supplementary material for: DNA/lysozyme binding propensity and nuclease properties of benzimidazole/2,2′-bipyridine based binuclear ternary transition metal complexes
Source: Royal Society of Chemistry journal article supplement (doi:10.1039/c9ra07188a), 2019-01-01
Supplement: c9ra07188a1.pdf [file c9ra07188a1.pdf]

Supporting Information

|                  |                                                                                                                                    |
|------------------|------------------------------------------------------------------------------------------------------------------------------------|
| <b>Figure S1</b> | Synthesis of benzimidazole ligand L                                                                                                |
| <b>Figure S2</b> | ATR spectra of a) L, b) <b>1</b> , c) <b>2</b> and d) <b>3</b> .                                                                   |
| <b>Figure S3</b> | ESI-MS(+) spectrum of <b>3</b> .                                                                                                   |
| <b>Figure S4</b> | Absorption spectra of complexes (a) <b>1</b> , (b) <b>2</b> and (c) <b>3</b> in DMF.                                               |
| <b>Figure S5</b> | TG and DTG curves of complexes <b>1–3</b> .                                                                                        |
| <b>Figure S6</b> | Calculated electronic spectra of the complexes studied here (a) <b>1</b> , (b) <b>2</b> and (c) <b>3</b> CAM-B3LYP/LANL2DZ method. |
| <b>Figure S7</b> | Selected FMO orbitals of mononuclear analogue of <b>1</b> .                                                                        |
| <b>Figure S8</b> | Selected FMO orbitals of mononuclear analogue of <b>2</b> .                                                                        |
| <b>Figure S9</b> | Selected FMO orbitals of mononuclear analogue of <b>3</b> .                                                                        |
| <b>Table S1</b>  | Selected bond lengths (Å), and angles (°) for <b>1–3</b> obtained at the B3LYP/LANL2DZ theory level.                               |
| <b>Table S2</b>  | Selected Mulliken charge values of the mononuclear models of <b>1–3</b> .                                                          |

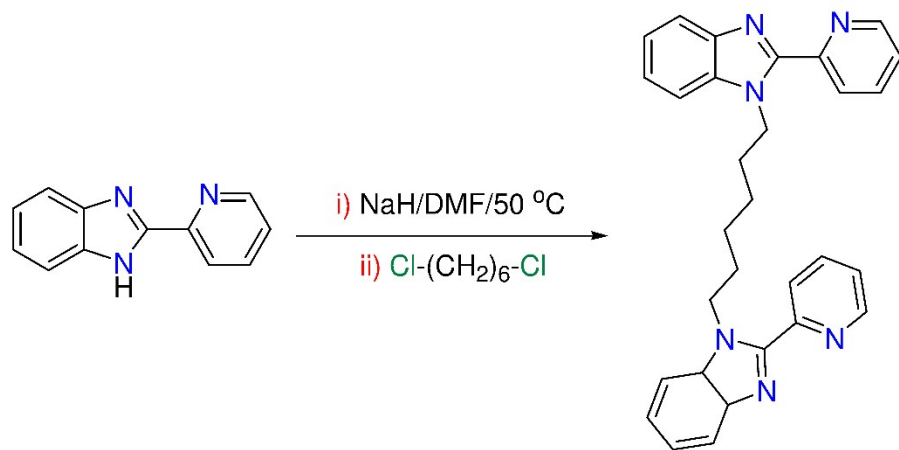

Figure S1 Synthesis of benzimidazole ligand L.<sup>[15]</sup>

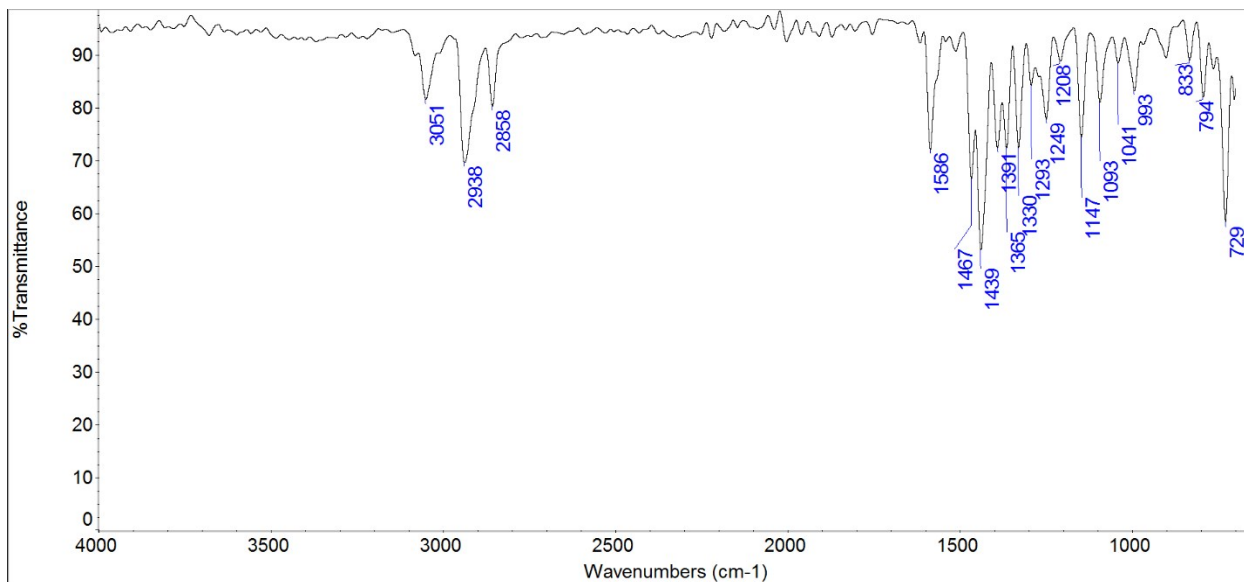

a)

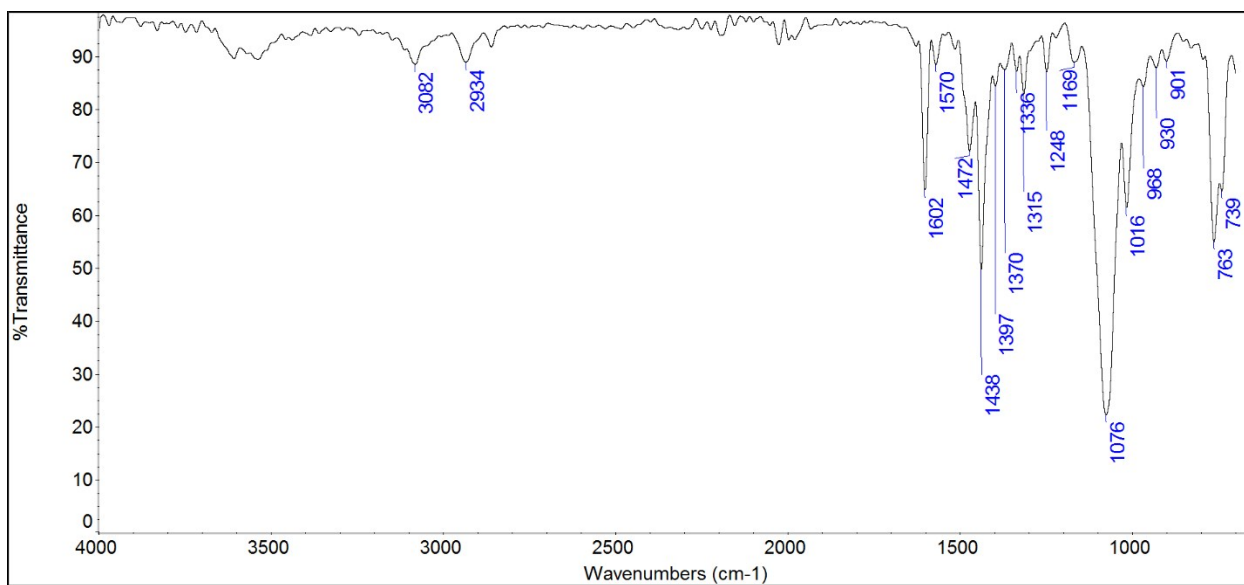

b)

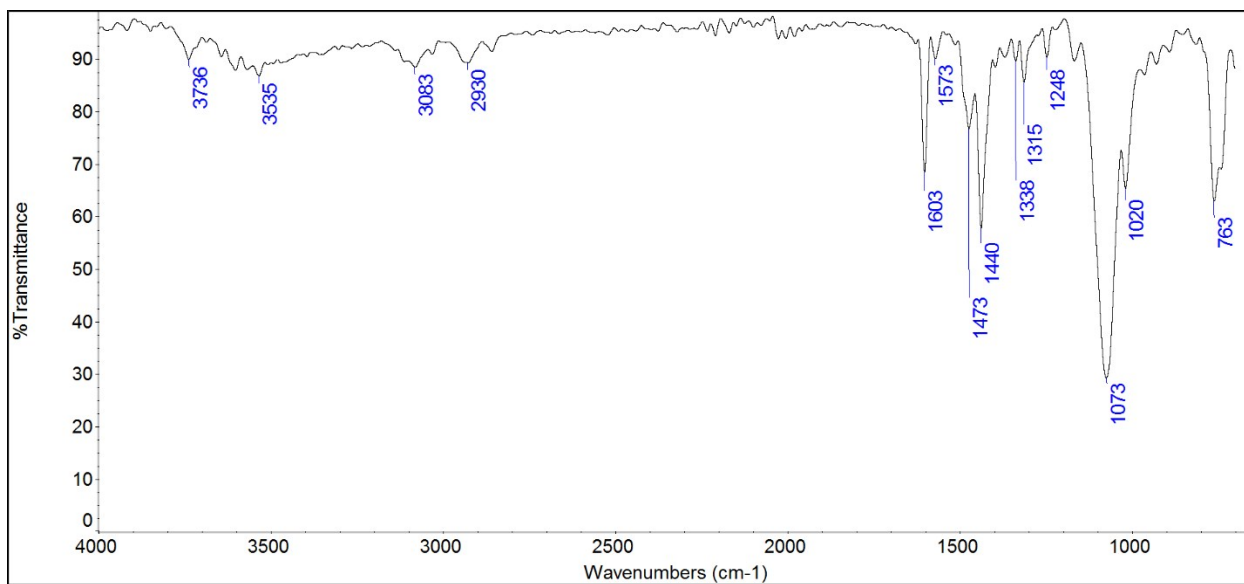

c)

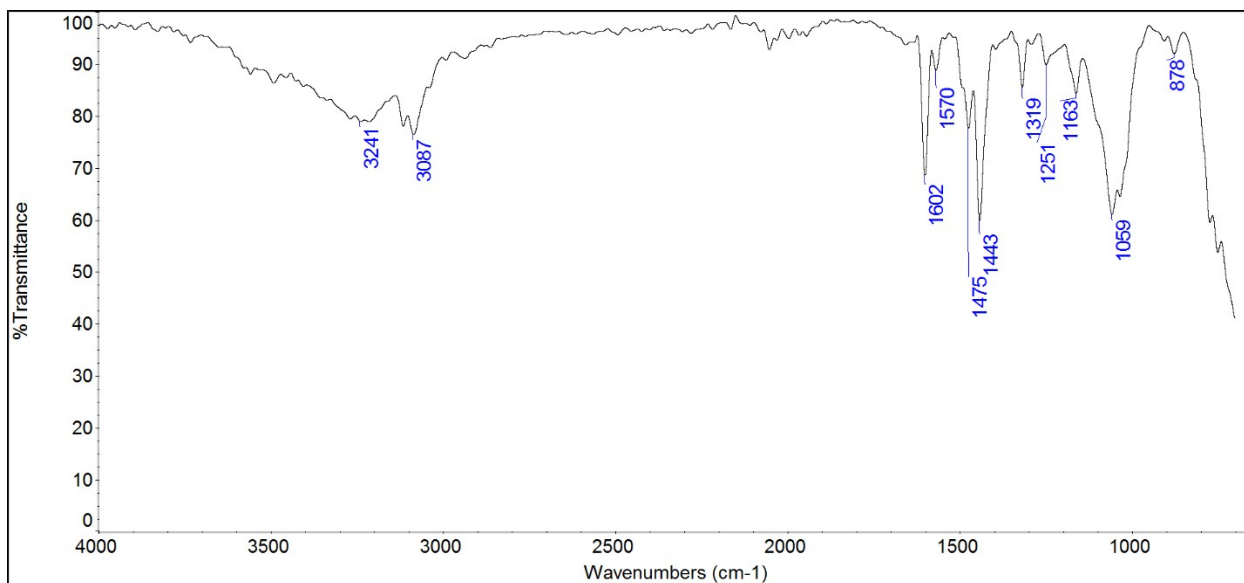

d)

Figure S2 ATR spectra of a) L, b) 1, c) 2 and d) 3.

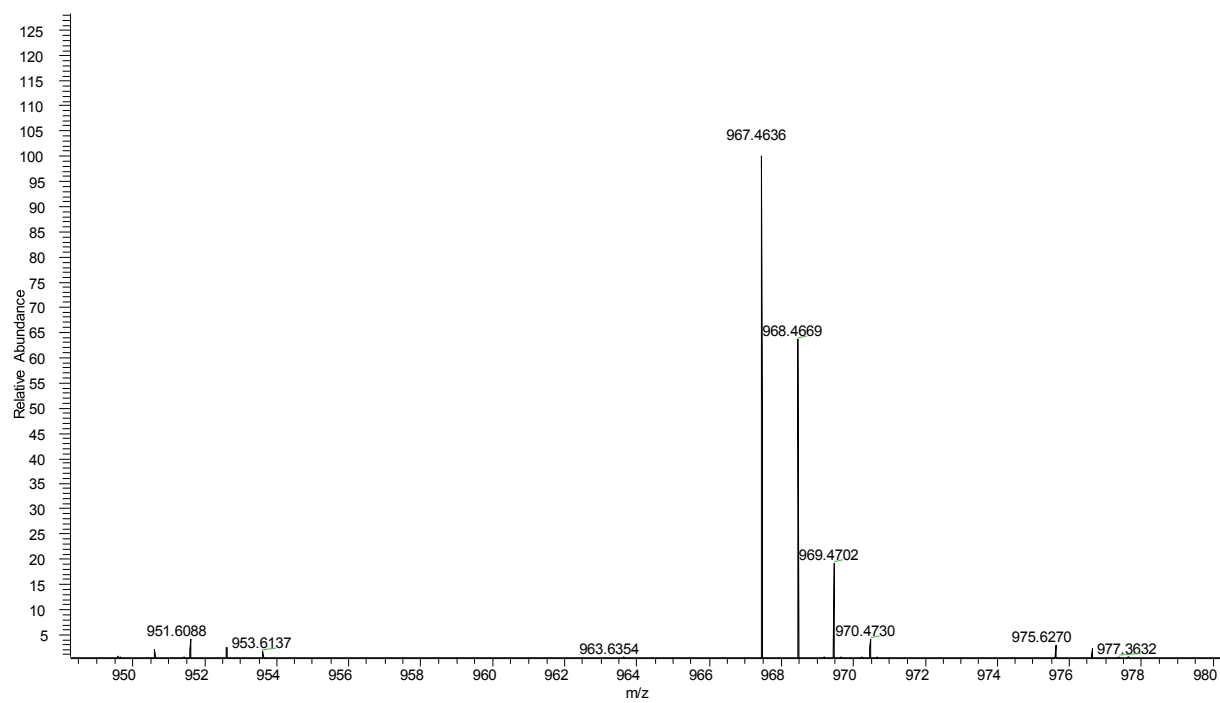

Figure S3 ESI-MS(+) spectrum of **3**.

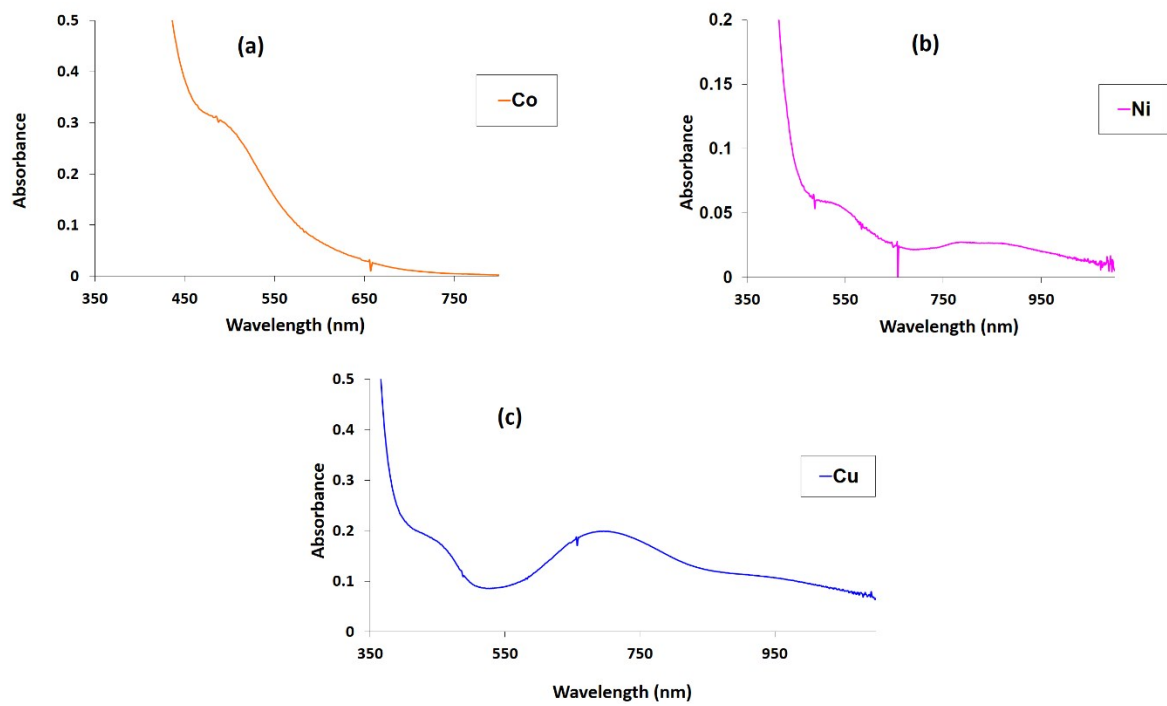

Figure S4 Absorption spectra of complexes (a) **1**, (b) **2** and (c) **3** in DMF.

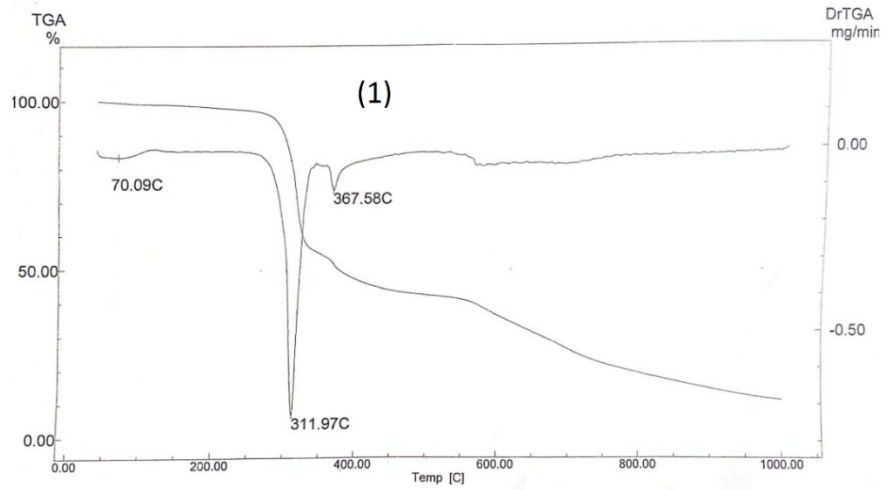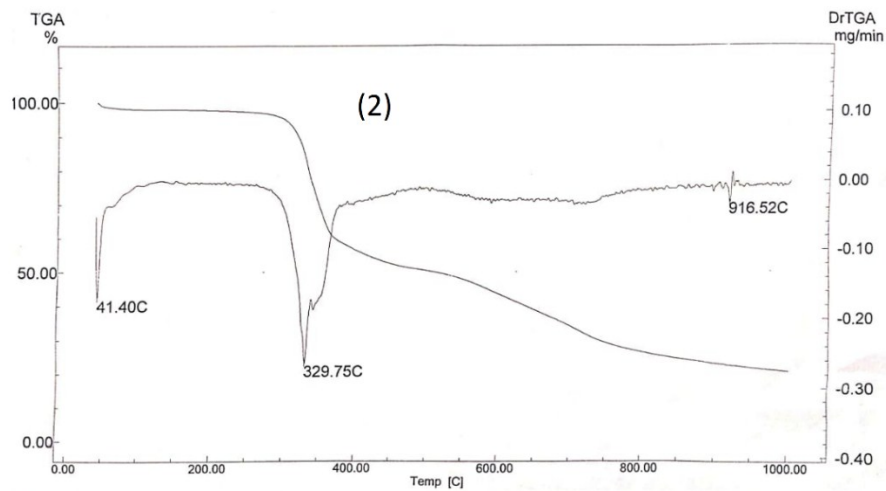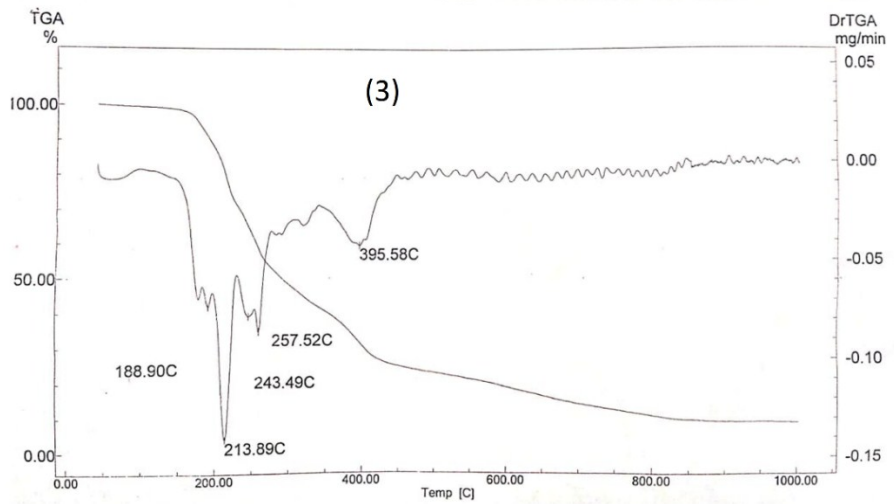

Figure S5 TG and DTG curves of complexes 1–3.

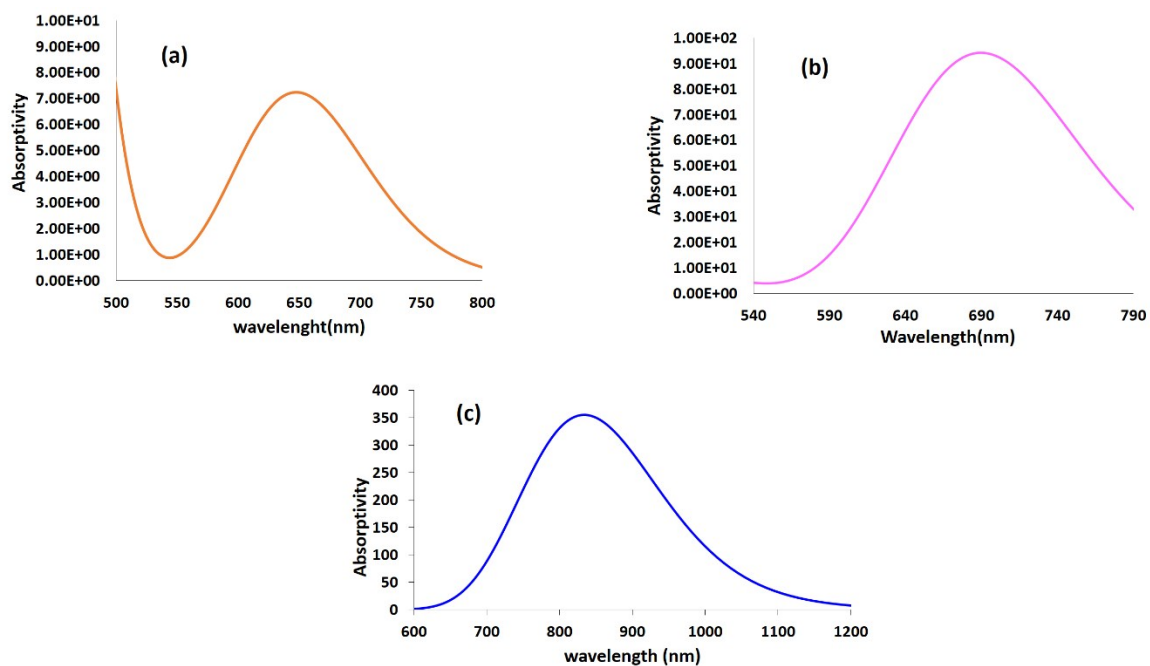

Figure S6 Calculated electronic spectra of the complexes studied here (a) **1**, (b) **2** and (c) **3** CAM-B3LYP/LANL2DZ method.



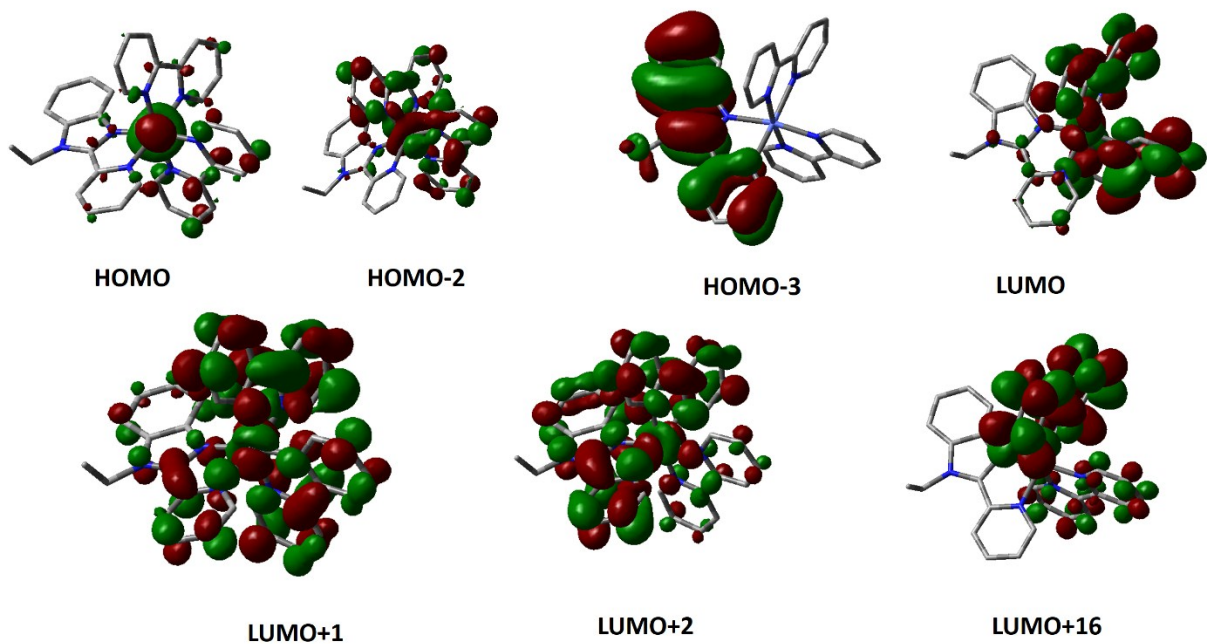

Figure S7 Selected FMO orbitals of mononuclear analogue of **1**.

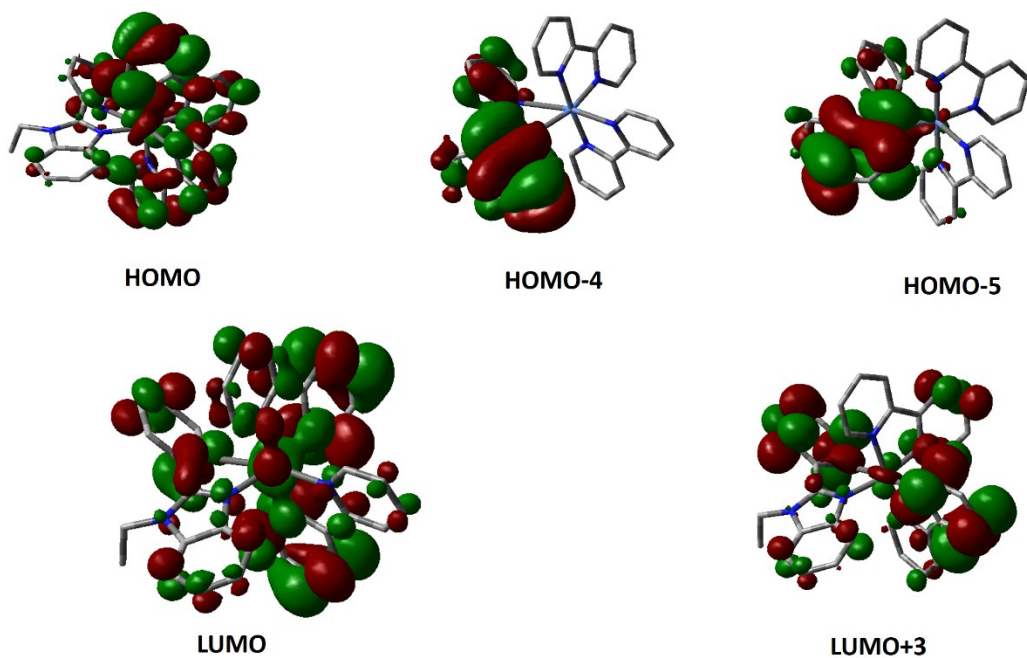

Figure S8 Selected FMO orbitals of mononuclear analogue of **2**.

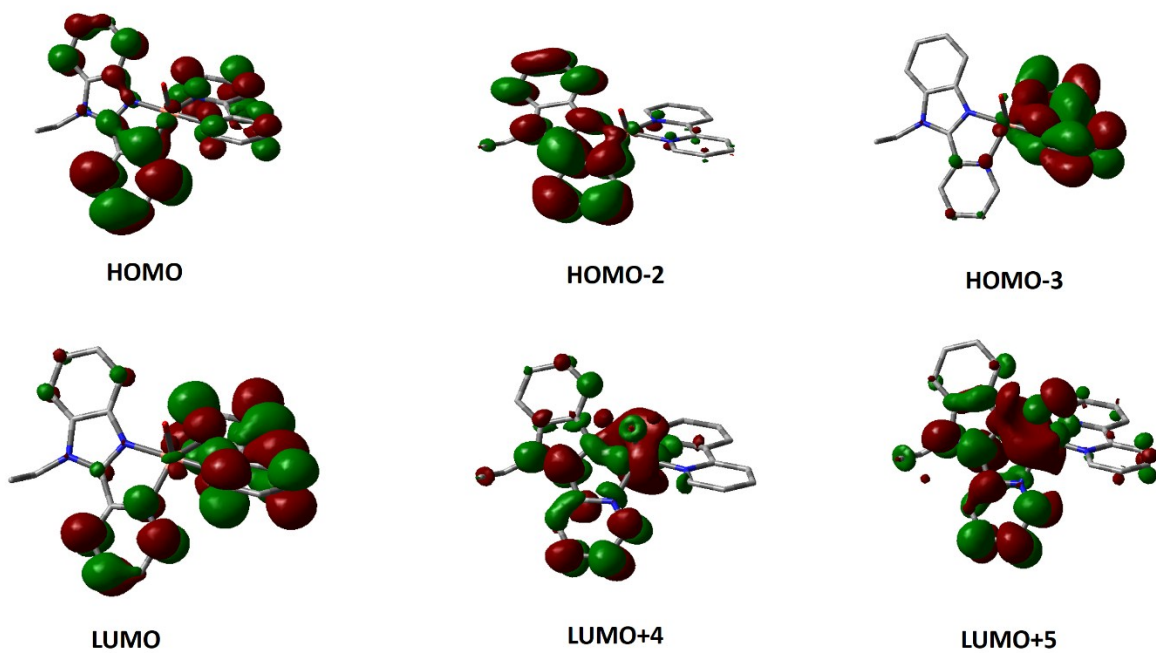

Figure S9 Selected FMO orbitals of mononuclear analogue of **3**

Table S1 Selected bond lengths (Å), and angles (°) for **1–3** obtained at the B3LYP/LANL2DZ theory level.

| <b>1</b>                |                                                                                       | <b>2</b>                |                                                                                     | <b>3</b>                |                                                        |
|-------------------------|---------------------------------------------------------------------------------------|-------------------------|-------------------------------------------------------------------------------------|-------------------------|--------------------------------------------------------|
| <b>Bond length (Å°)</b> | <b>Bond angle (°)</b>                                                                 | <b>Bond length (Å°)</b> | <b>Bond angle (°)</b>                                                               | <b>Bond length (Å°)</b> | <b>Bond angle(°)</b>                                   |
| Co–N1= 2.277            | N2–Co–N67 = 169.85<br>N1–Co–N69 = 175.99<br>N68–Co–N70 = 173.19<br>N68–Co–N67 = 81.99 | Ni–N1= 3.165            | N68– Ni –N67= 83.23<br>N1–Ni –N69= 167.55<br>N2–Co–N67 =159.69<br>N68–Co–N70=175.82 | Cu–N1= 2.132            | N1–Cu–N2=79.76<br>N49–Cu–N50=80.86<br>N1–Cu–N49=100.57 |
| Co–N2 = 1.998           | N2–Co–N70 = 89.27                                                                     | Ni–N2= 1.951            | N2–Ni–N70= 89.63                                                                    | Cu–N2= 1.973            | O52–Cu–N2=88.24                                        |
| Co–N67 = 1.997          | N69–Co–N67 = 87.96                                                                    | Ni–N67= 1.974           | N69–Ni–N67= 90.45                                                                   | Cu–N49= 2.005           | O52–Cu–N1=115.65                                       |
| Co–N68 = 1.991          | N1–Co–N68 = 89.11                                                                     | Ni–N68= 1.928           | N1– Ni –N68= 94.016                                                                 | Cu–N50=2.079            | O52–Cu–N50=118.82                                      |
| Co–N69 = 2.222          | N1–Co–N2 = 77.21                                                                      | Ni–N69= 2.377           | N1– Ni –N2= 68.30                                                                   | Cu–O= 2.191             | O52–Cu–N49=88.53                                       |
| Co–N70 = 2.005          |                                                                                       | Co–N70= 1.937           |                                                                                     |                         | N50–Cu–N2=101.78                                       |

| <b>1</b> |           | <b>2</b> |           | <b>3</b> |           |
|----------|-----------|----------|-----------|----------|-----------|
| N(1)     | -0.155821 | N(1)     | -0.100372 | N(1)     | -0.269480 |
| N(2)     | -0.281633 | N(2)     | -0.343720 | N(2)     | -0.380299 |
| N(67)    | -0.220799 | N(67)    | -0.223615 | N(49)    | -0.305435 |
| N(68)    | -0.223691 | N(68)    | -0.254231 | N(50)    | -0.291107 |
| N(69)    | -0.172202 | N(69)    | -0.133946 | O(52)    | -0.713220 |
| N(70)    | -0.234979 | N(70)    | -0.280498 | Cu(II)   | 0.711931  |
| Co(II)   | 0.430933  | Ni(II)   | 0.464320  |          |           |
